# Supplementary material
Source: PubMed Central journal article supplement (PMC515357)

**A**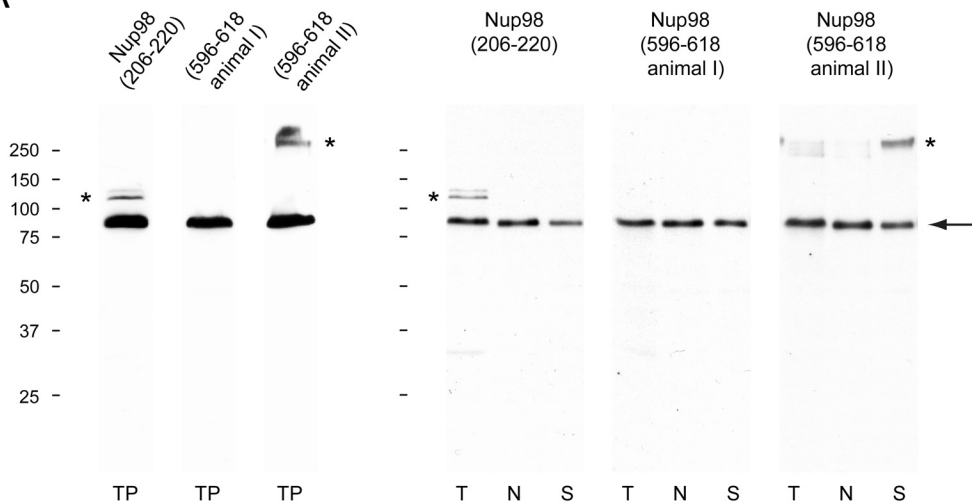**B**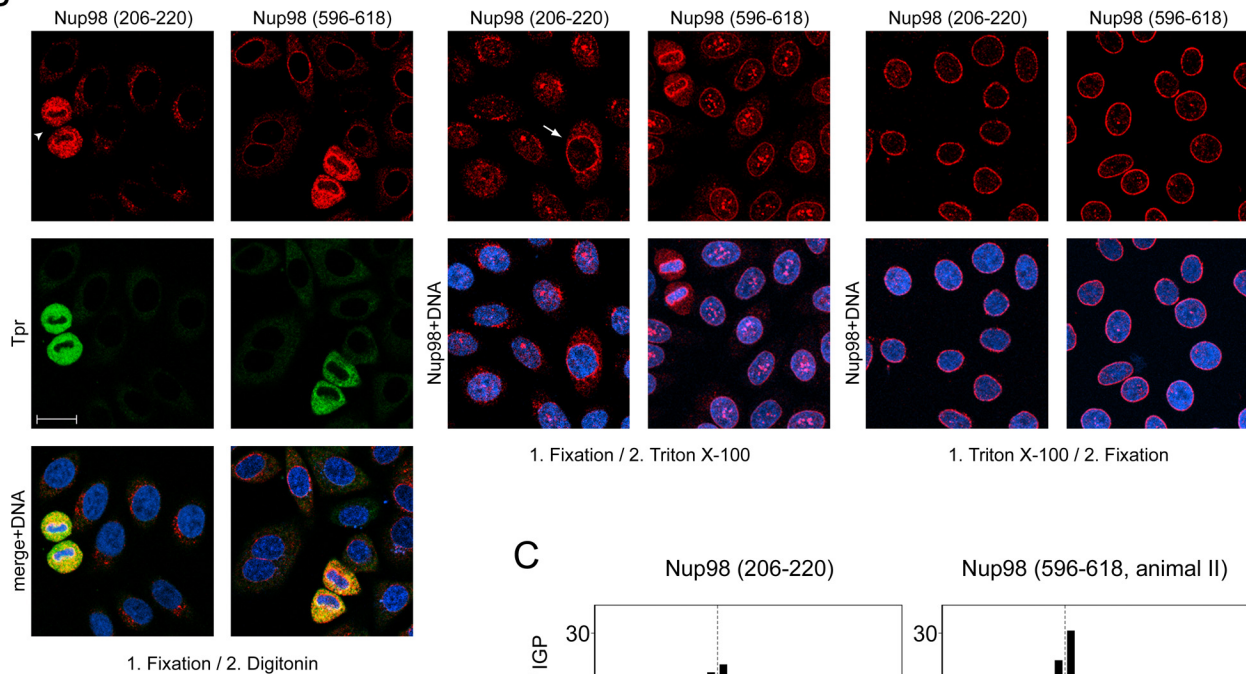**C**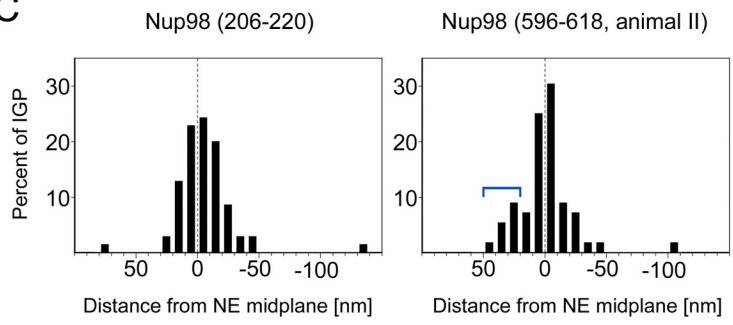

Supplement: mbc_E04-03-0165_1.pdf [file mbc_E04-03-0165_1.pdf]

**A**

Nup96 (880-900)

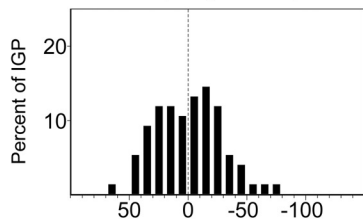

Nup107 (33-51)

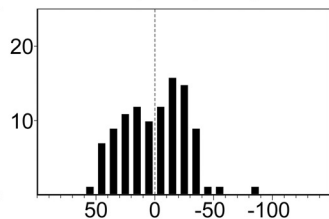

Nup153 (22-36)

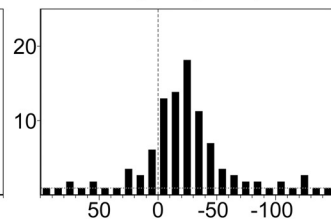

Nup93 (350-369)

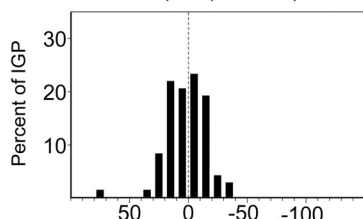

Nup205 (1784-1803)

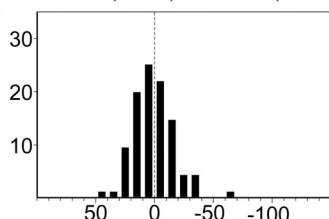

Nup98 (596-618)

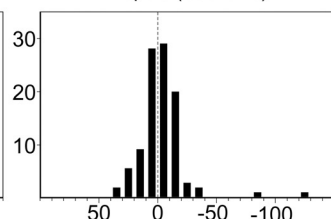**B**

Tpr (636-655)

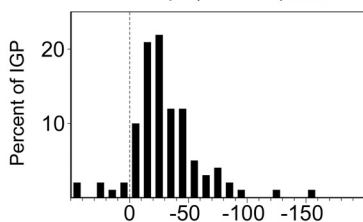

Tpr (2063-2084)

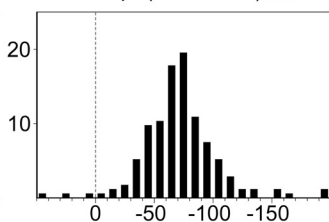

Tpr (914-932)

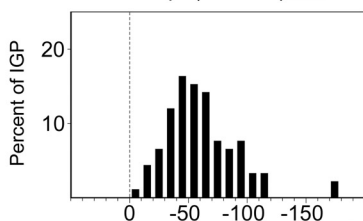

Tpr (2338-2363)

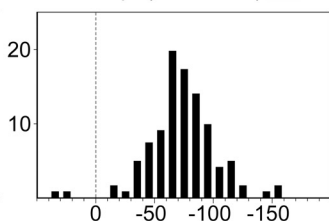

Supplement: mbc_E04-03-0165_2.pdf [file mbc_E04-03-0165_2.pdf]

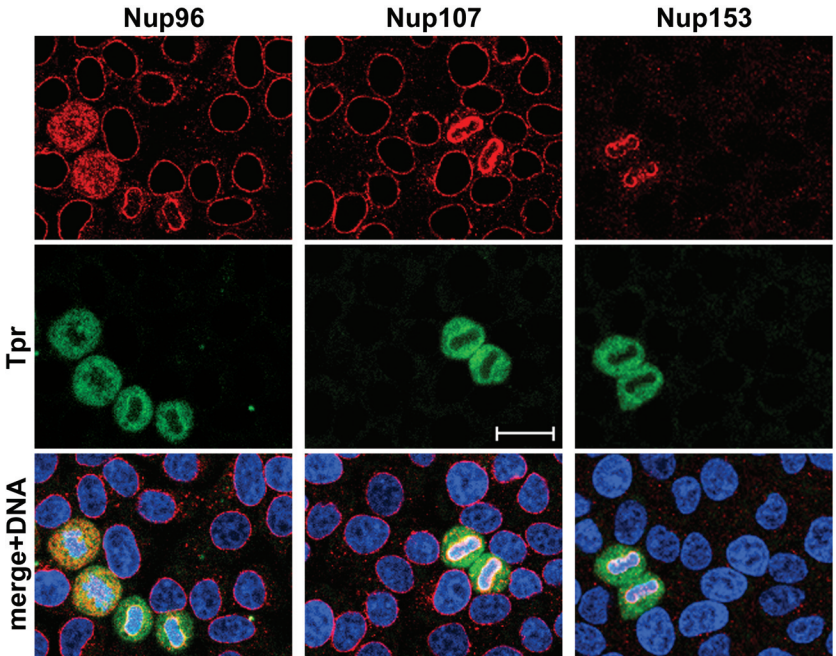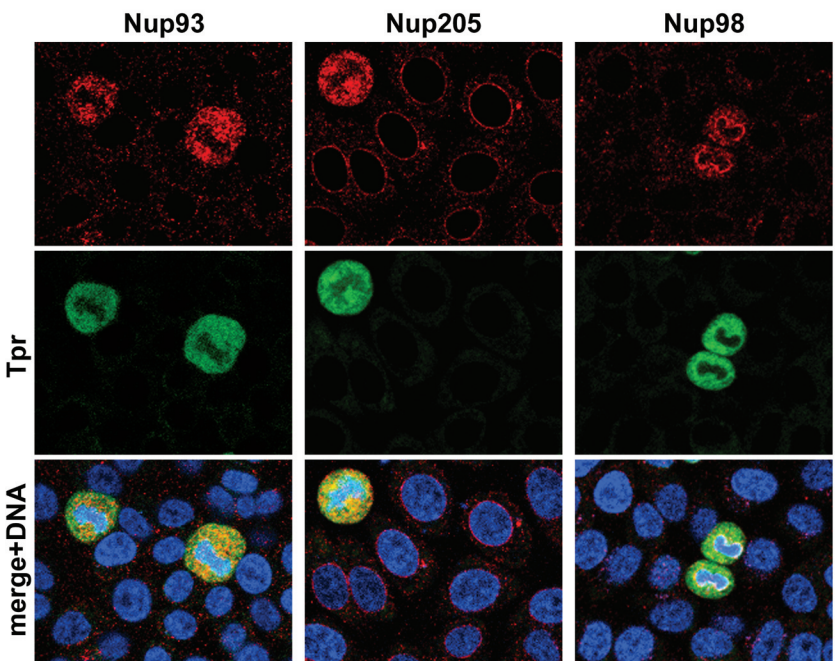

Supplemental Figure S3

Supplement: mbc_E04-03-0165_3.pdf [file mbc_E04-03-0165_3.pdf]

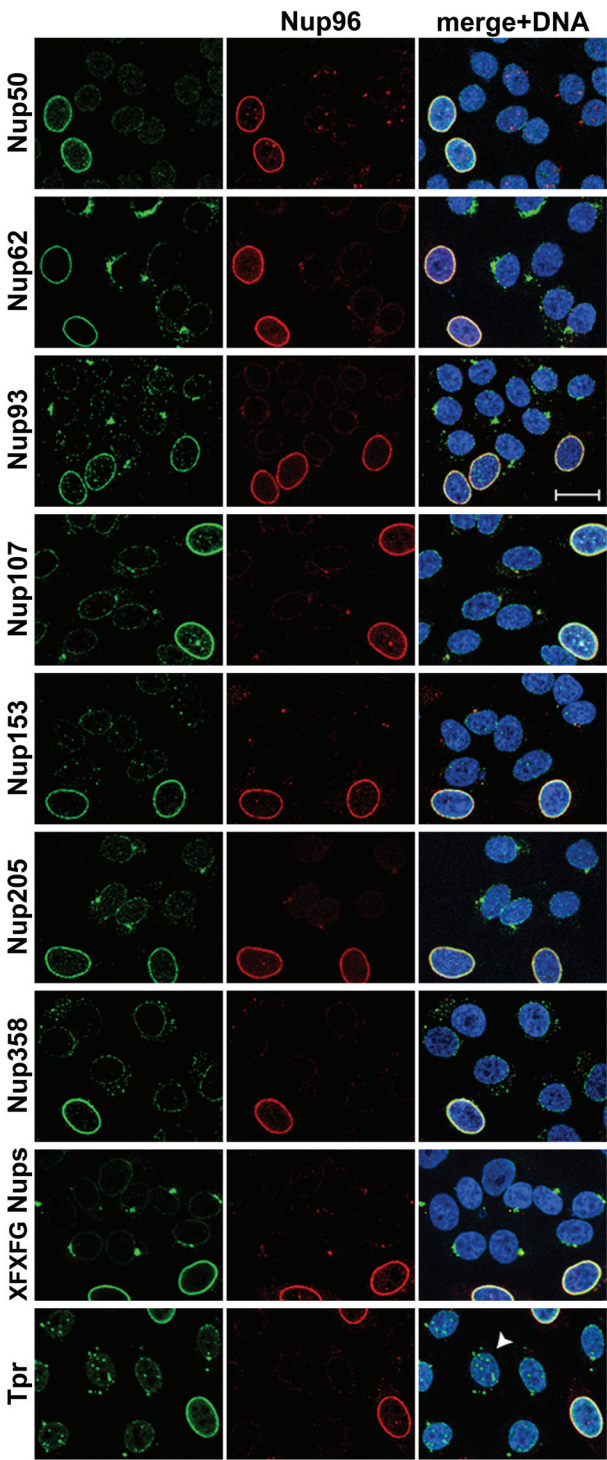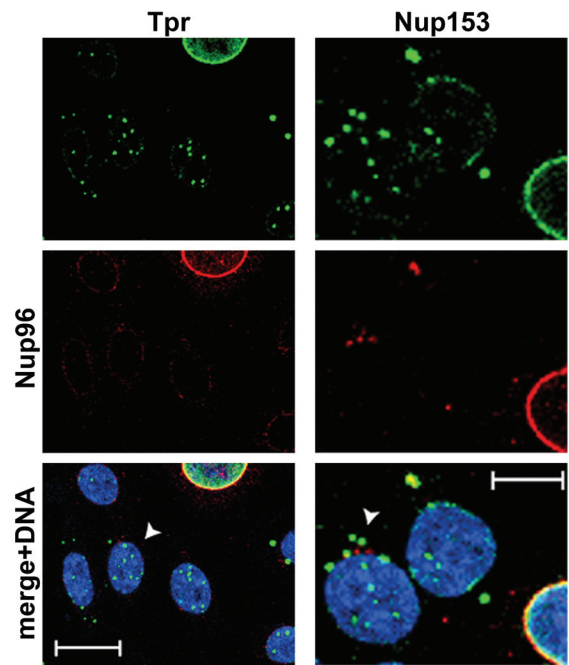

Supplemental Figure S4

Supplement: mbc_E04-03-0165_4.pdf [file mbc_E04-03-0165_4.pdf]

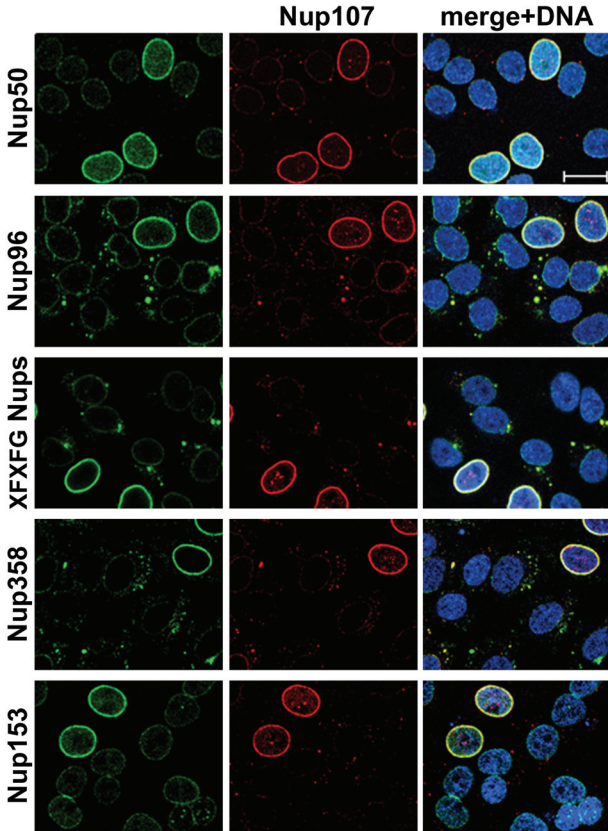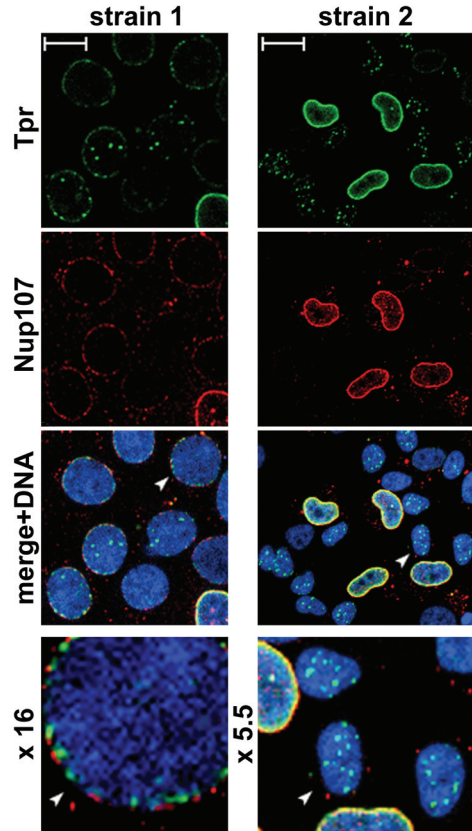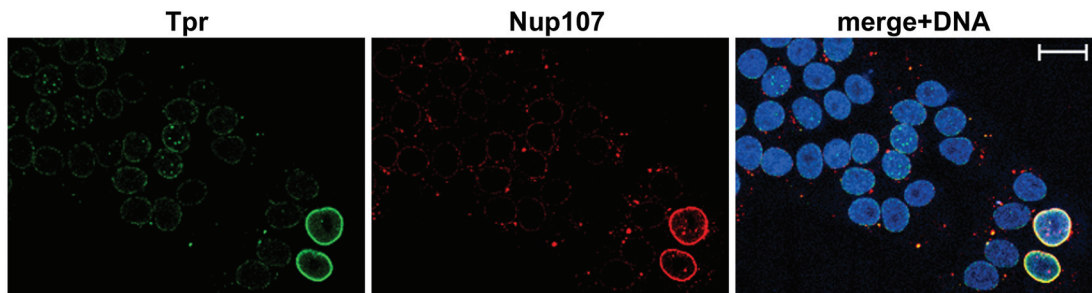

Supplemental Figure S5

Supplement: mbc_E04-03-0165_5.pdf [file mbc_E04-03-0165_5.pdf]

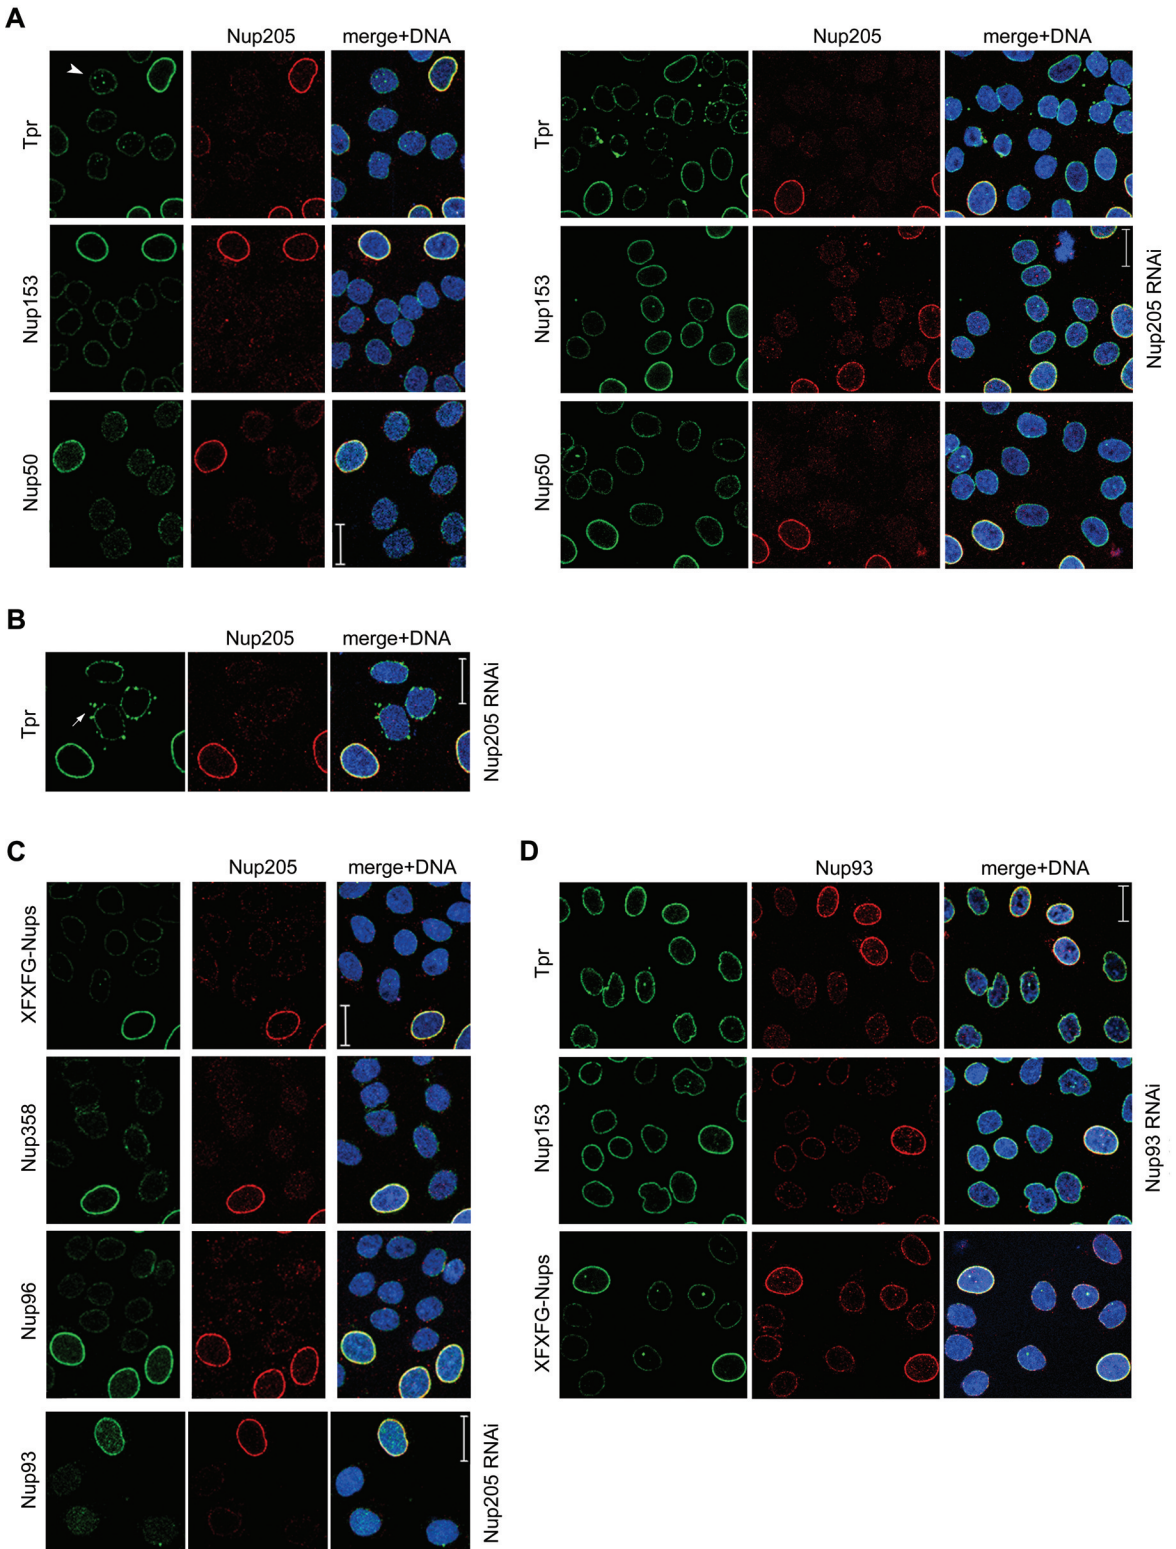

Supplement: mbc_E04-03-0165_6.pdf [file mbc_E04-03-0165_6.pdf]

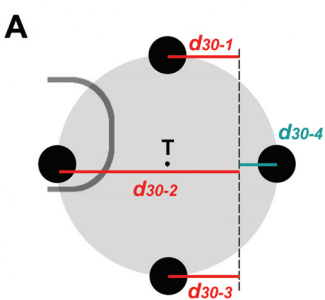

Antibody rotation radius of 30 nm

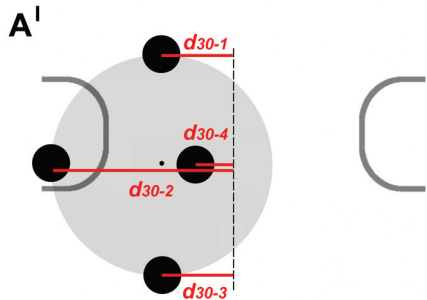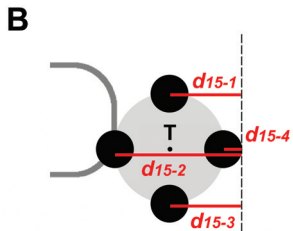

Antibody rotation radius of 15 nm

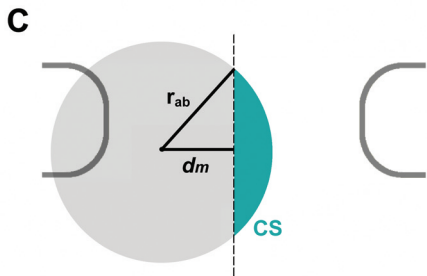

Supplement: mbc_E04-03-0165_7.pdf [file mbc_E04-03-0165_7.pdf]
